# Supplementary material
Source: PubMed Central journal article supplement (PMC3253959)

### Supplemental Figure 1

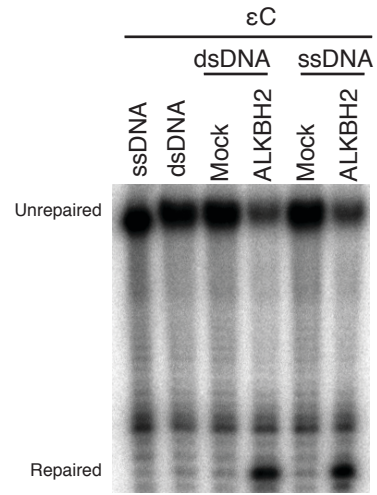

# Supplemental Figure 2

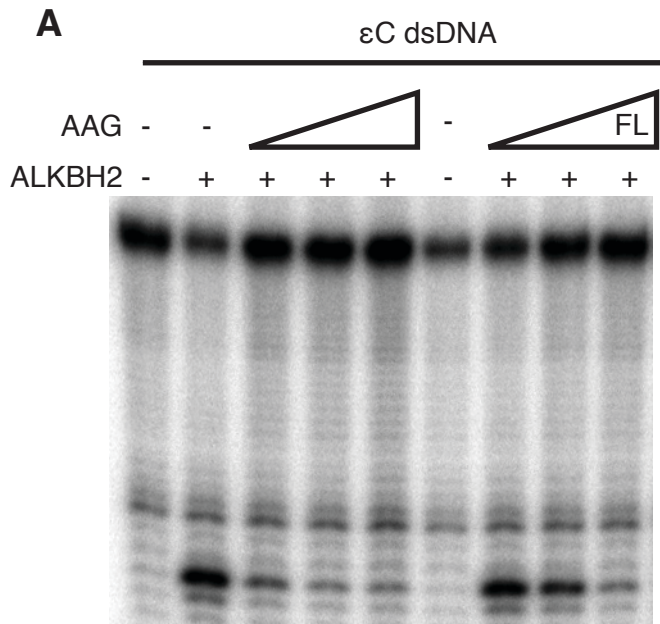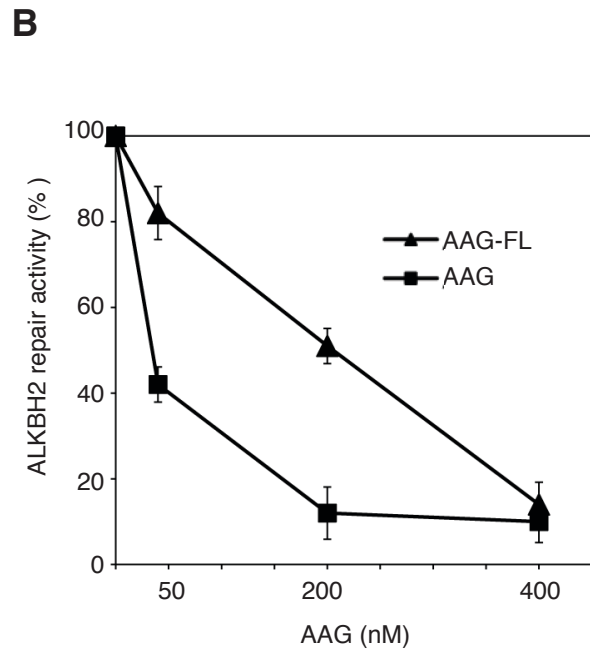

Supplement: NIHMS334962-supplement-02.pdf [file NIHMS334962-supplement-02.pdf]
